# Supplementary material for: SI traceable determination of arsenic species in kelp (Thallus laminariae)
Source: Royal Society of Chemistry journal article supplement (doi:10.1039/c7ay01111c), 2017-01-01
Supplement: c7ay01111c1.pdf [file c7ay01111c1.pdf]

Supplemental Table S1. Mass fraction of arsenosugar, DMA, and total arsenic in the extract of SRM 3232. Values are in mg kg<sup>-1</sup> units

|         | As(328) | As(328)c* | DMA             | As(482)         | As(392)           | As(sum) | As(total) |
|---------|---------|-----------|-----------------|-----------------|-------------------|---------|-----------|
| RA1     | 1.49    | 0.76      | 0.49            | 5.09            | 13.45             | 20.51   | 18.4      |
| RA2     | 1.02    | 1.49      | 0.64            | 4.99            | 13.03             | 19.68   | 22.8      |
| RB1     | 1.20    | 1.30      | 0.47            | 5.32            | 14.79             | 21.77   | 22.1      |
| RB2     | 1.31    | 1.26      | 0.32            | 5.16            | 14.84             | 21.63   | 22.0      |
| RC1     | 0.81    | 0.99      | <del>3.42</del> | <del>6.35</del> | 11.82             |         | 20.3      |
| RC2     | 0.96    | 1.18      | <del>2.68</del> | 5.02            | 13.38             |         | 20.6      |
| RD1     | 1.32    | 0.72      | 0.28            | 5.00            | 11.57             | 18.17   | 20.3      |
| RD2     | 1.16    | 1.20      | 0.37            | 5.31            | 13.26             | 20.10   | 20.4      |
| RE1     | 0.93    | 1.13      | 0.35            | 5.59            | <del>203.16</del> |         | 19.9      |
| RE2     | 1.40    | 0.79      | 0.61            | 5.39            | <del>24.11</del>  |         | 19.6      |
| RF1     | 1.16    | 1.55      | 0.52            | 5.19            | 12.02             | 18.89   | 18.9      |
| RF2     | 1.34    | 1.26      | 0.24            | 5.81            | 13.51             | 20.89   | 20.4      |
| RG1     | 0.60    | 0.91      | 0.36            | 5.57            | 12.90             | 19.43   | 20.7      |
| RG2     | 1.21    | 0.97      | 0.39            | 4.62            | 12.71             | 18.93   | 21.6      |
| RH1     | 1.00    | 1.02      | 0.40            | 5.34            | 13.51             | 20.24   | 19.9      |
| RH2     | 1.06    | 1.14      | 0.34            | 5.11            | 13.64             | 20.15   | 20.3      |
| Average | 1.12    | 1.10      | 0.41            | 5.23            | 13.17             | 20.0    | 20.5      |
| s       | 0.23    | 0.24      | 0.12            | 0.29            | 0.96              | 1.1     | 1.2       |
| RSD, %  | 21      | 22        | 29              | 5.6             | 7.3               | 5.4     | 5.6       |

\* results of As(328) obtained by cation exchange LC-INAA.

Outliers found by the Grubb's test are in strike-out font.
